# Supplementary material for: Cyto-toxicity and biocompatibility of a family of choline phosphate ionic liquids designed for pharmaceutical applications
Source: Royal Society of Chemistry journal article supplement (doi:10.1039/b918726j), 2010-01-01
Supplement: b918726j.pdf [file b918726j.pdf]

## Electronic Supplementary Information for:

### Cyto-toxicity and biocompatibility of a family of choline phosphate ionic liquids designed for pharmaceutical applications

Katherine D. Weaver,<sup>a</sup> Hye Jin Kim,<sup>a</sup> Jiazeng Sun,<sup>b</sup> Douglas R. MacFarlane,<sup>b</sup> and Gloria D. Elliott,<sup>\*a</sup>

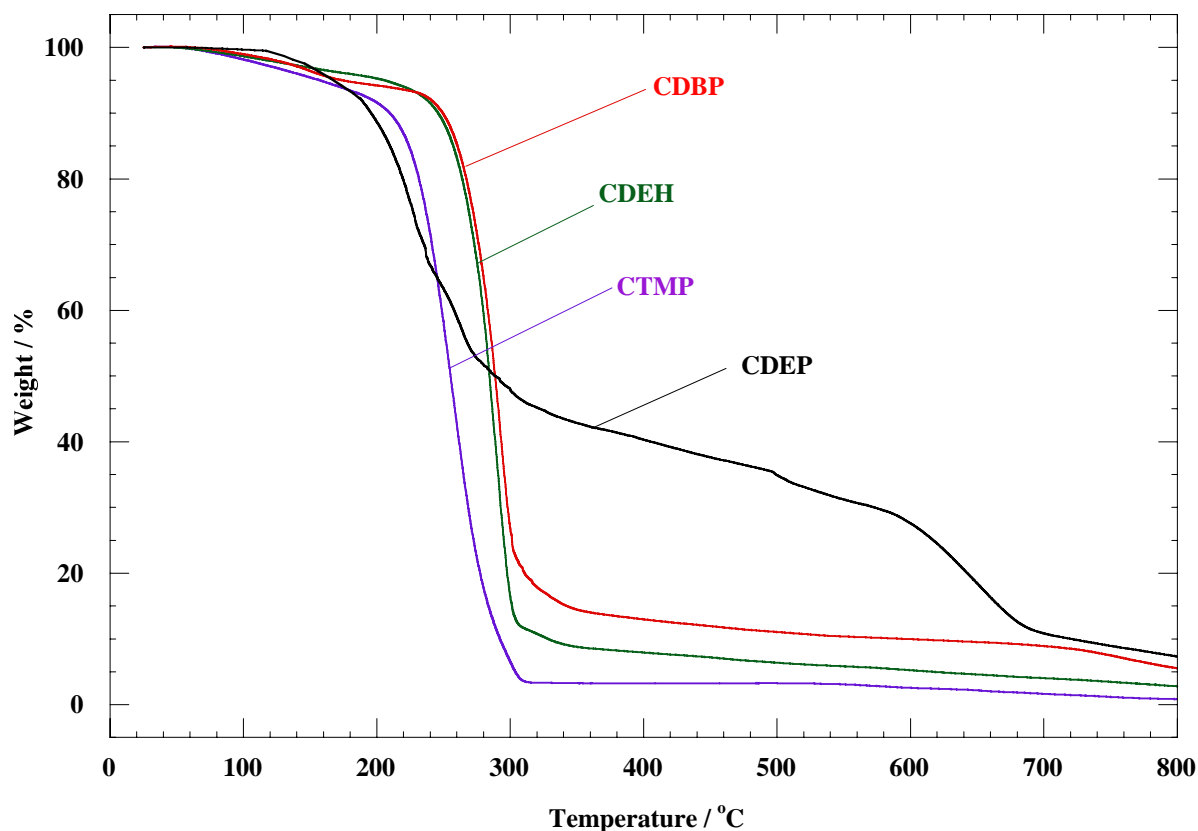

**Figure S1: Thermogravimetric Analysis (PerkinElmer) of choline ILs.** Scan rate was 10.0 °C/min from room temperature to 800 °C under a nitrogen atmosphere.

<sup>a</sup> Department of Mechanical Engineering and Engineering Science, University of North Carolina, Charlotte, North Carolina, 28223, USA

<sup>b</sup> School of Chemistry, Monash University, Clayton VIC 3800, Australia

\* Corresponding author. E-mail address: [gdelliot@uncc.edu](mailto:gdelliot@uncc.edu) (G. Elliott)
